# Supplementary material for: SNRPD1 confers diagnostic and therapeutic values on breast cancers through cell cycle regulation
Source: Research Square preprint supplement (doi:10.21203/rs.3.rs-105332/v1), 2020-11-17
Supplement: Supplementary file 1 [file ebde02e6d596fb4606d058df.XLSX]

## Sheet: I
Supplementary Table I. Information on siRNAs purchased for knocking down SNRPD1 in the study.
Type	Gene	Catalog No.	Sequence( sense 5'->3')	Sequence( anti sense 5'->3')	Company
siRNA-1	SNRPD1	93540	CAUUCGGUAUUUUAUUCUATT	UAGAAUAAAAUACCGAAUGTT	GenePharma
siRNA-2	SNRPD1	94067	UUGUGGAUGUUGAACCUAATT	UUAGGUUCAACAUCCACAAGT	GenePharma
Negative control	None	93642	GenePharma Silencer Select Negative Control		GenePharma

## Sheet: II
Supplementary Table II. Information on the qPCR primers used in the experiment.
Gene	Forward primer	Reverse primer
SNRPD1	AGTCGGTCAGTGTTCGGTTG	TTCATGCTGACATCCACACCT
GAPDH	CCCACTCCTCCACCTTTGAC	ATGAGGTCCACCACCCTGTT
CCND1	GACCCCGCACGATTTCATTG	CTCTGGAGAGGAAGCGTGTG

## Sheet: III
Supplementary Table III. Information of 434 SRTNS from data analysis using protein MS data.
Gene Symbol	ENTREZ ID	Genomic Location	Description
CDC20	991	1p34.2	cell division cycle 20
PAK1IP1	55003	6p24.2	PAK1 interacting protein 1
CHEK1	1111	11q24.2	checkpoint kinase 1
RPL22	6146	1p36.31	ribosomal protein L22
FAM111B	374393	11q12.1	family with sequence similarity 111 member B
PCGF6	84108	10q24.33	polycomb group ring finger 6
RPL35A	6165	3q29	ribosomal protein L35a
KIF2C	11004	1p34.1	kinesin family member 2C
CENPF	1063	1q41	centromere protein F
CHRAC1	54108	8q24.3	chromatin accessibility complex subunit 1
WDR75	84128	2q32.2	WD repeat domain 75
MCM7	4176	7q22.1	minichromosome maintenance complex component 7
PLK1	5347	16p12.2	polo like kinase 1
NCAPD2	9918	12p13.31	non-SMC condensin I complex subunit D2
NCAPG	64151	4p15.31	non-SMC condensin I complex subunit G
MCM3	4172	6p12.2	minichromosome maintenance complex component 3
MCM5	4174	22q12.3	minichromosome maintenance complex component 5
SMC4	10051	3q25.33	structural maintenance of chromosomes 4
SMC2	10592	9q31.1	structural maintenance of chromosomes 2
RPS16	6217	19q13.2	ribosomal protein S16
NCAPH	23397	2q11.2	non-SMC condensin I complex subunit H
WDR12	55759	2q33.2	WD repeat domain 12
RPL11	6135	1p36.11	ribosomal protein L11
IL17RA	23765	22q11.1	interleukin 17 receptor A
DDX47	51202	12p13.1	DEAD-box helicase 47
EZH2	2146	7q36.1	enhancer of zeste 2 polycomb repressive complex 2 subunit
TTK	7272	6q14.1	TTK protein kinase
CENPQ	55166	6p12.3	centromere protein Q
MCM6	4175	2q21.3	minichromosome maintenance complex component 6
MCM4	4173	8q11.21	minichromosome maintenance complex component 4
DDX49	54555	19p13.11	DEAD-box helicase 49
HEATR1	55127	1q43	HEAT repeat containing 1
NOL10	79954	2p25.1	nucleolar protein 10
NUF2	83540	1q23.3	NUF2 component of NDC80 kinetochore complex
USP1	7398	1p31.3	ubiquitin specific peptidase 1
RPL15	6138	3p24.2	ribosomal protein L15
MCM2	4171	3q21.3	minichromosome maintenance complex component 2
NDC80	10403	18p11.32	NDC80 kinetochore complex component
ABCF1	23	6p21.33	ATP binding cassette subfamily F member 1
RPS24	6229	10q22.3	ribosomal protein S24
CDK1	983	10q21.2	cyclin dependent kinase 1
IMP3	55272	15q24.2	IMP U3 small nucleolar ribonucleoprotein 3
SASS6	163786	1p21.2	SAS-6 centriolar assembly protein
NOL11	25926	17q24.2	nucleolar protein 11
RPL13A	23521	19q13.33	ribosomal protein L13a
CDCA8	55143	1p34.3	cell division cycle associated 8
PWP2	5822	21q22.3	PWP2 small subunit processome component
MCM10	55388	10p13	minichromosome maintenance 10 replication initiation factor
TBL3	10607	16p13.3	transducin beta like 3
DLGAP5	9787	14q22.3	DLG associated protein 5
CCNA2	890	4q27	cyclin A2
NAA50	80218	3q13.31	N(alpha)-acetyltransferase 50, NatE catalytic subunit
DDX18	8886	2q14.1	DEAD-box helicase 18
NOL6	65083	9p13.3	nucleolar protein 6
PAPOLG	64895	2p16.1	poly(A) polymerase gamma
ECT2	1894	3q26.31	epithelial cell transforming 2
ABT1	29777	6p22.2	activator of basal transcription 1
SPC25	57405	2q24.3	SPC25 component of NDC80 kinetochore complex
RPL3	6122	22q13.1	ribosomal protein L3
KDM3A	55818	2p11.2	lysine demethylase 3A
CDC45	8318	22q11.21	cell division cycle 45
LYAR	55646	4p16.3	Ly1 antibody reactive
FANCD2	2177	3p25.3	FA complementation group D2
WDR36	134430	5q22.1	WD repeat domain 36
SMCHD1	23347	18p11.32	structural maintenance of chromosomes flexible hinge domain containing 1
SUV39H1	6839	Xp11.23	suppressor of variegation 3-9 homolog 1
MDN1	23195	6q15	midasin AAA ATPase 1
WDR74	54663	11q12.3	WD repeat domain 74
FCF1	51077	14q24.3	FCF1 rRNA-processing protein
KIN	22944	10p14	Kin17 DNA and RNA binding protein
RPS6	6194	9p22.1	ribosomal protein S6
DDX27	55661	20q13.13	DEAD-box helicase 27
RRP1	8568	21q22.3	ribosomal RNA processing 1
POLA2	23649	11q13.1	DNA polymerase alpha 2, accessory subunit
RBM34	23029	1q42.3	RNA binding motif protein 34
SPC24	147841	19p13.2	SPC24 component of NDC80 kinetochore complex
CEBPZ	10153	2p22.2	CCAAT enhancer binding protein zeta
RIOK1	83732	6p24.3	RIO kinase 1
RPL7L1	285855	6p21.1	ribosomal protein L7 like 1
UBE2T	29089	1q32.1	ubiquitin conjugating enzyme E2 T
KIF4A	24137	Xq13.1	kinesin family member 4A
PATL1	219988	11q12.1	PAT1 homolog 1, processing body mRNA decay factor
AATF	26574	17q12	apoptosis antagonizing transcription factor
ABCB10	23456	1q42.13	ATP binding cassette subfamily B member 10
CIRH1A	NA	NA	NA
NOP2	4839	12p13.31	NOP2 nucleolar protein
UTP15	84135	5q13.2	UTP15 small subunit processome component
LRRC8B	23507	1p22.2	leucine rich repeat containing 8 VRAC subunit B
UTP6	55813	17q11.2	UTP6 small subunit processome component
GTPBP4	23560	10p15.3	GTP binding protein 4
MASTL	84930	10p12.1	microtubule associated serine/threonine kinase like
MPHOSPH10	10199	2p13.3	M-phase phosphoprotein 10
PRIM2	5558	6p11.2	DNA primase subunit 2
CEP85	64793	1p36.11	centrosomal protein 85
PES1	23481	22q12.2	pescadillo ribosomal biogenesis factor 1
WDR3	10885	1p12	WD repeat domain 3
RPS2	6187	16p13.3	ribosomal protein S2
UTP18	51096	17q21.33	UTP18 small subunit processome component
DHX34	9704	19q13.32	DExH-box helicase 34
RRP15	51018	1q41	ribosomal RNA processing 15 homolog
UTP3	57050	4q13.3	UTP3 small subunit processome component
MTF2	22823	1p22.1	metal response element binding transcription factor 2
UTP23	84294	8q24.11	UTP23 small subunit processome component
KIFC1	3833	6p21.32	kinesin family member C1
ZWINT	11130	10q21.1	ZW10 interacting kinetochore protein
PLIN3	10226	19p13.3	perilipin 3
CKAP2	26586	13q14.3	cytoskeleton associated protein 2
CCNB1	891	5q13.2	cyclin B1
HAUS5	23354	19q13.12	HAUS augmin like complex subunit 5
RSL1D1	26156	16p13.13	ribosomal L1 domain containing 1
NCL	4691	2q37.1	nucleolin
RPL18	6141	19q13.33	ribosomal protein L18
CENPL	91687	1q25.1	centromere protein L
TAF2	6873	8q24.12	TATA-box binding protein associated factor 2
REXO4	57109	9q34.2	REX4 homolog, 3'-5' exonuclease
RPS8	6202	1p34.1	ribosomal protein S8
RPL7	6129	8q21.11	ribosomal protein L7
C2orf44	NA	NA	NA
DDX21	9188	10q22.1	DExD-box helicase 21
ABCF2	10061	7q36.1	ATP binding cassette subfamily F member 2
NCAPD3	23310	11q25	non-SMC condensin II complex subunit D3
DIEXF	NA	NA	NA
CHAF1B	8208	21q22.12-q22.13	chromatin assembly factor 1 subunit B
KIF22	3835	16p11.2	kinesin family member 22
KIF20A	10112	5q31.2	kinesin family member 20A
DDX10	1662	11q22.3	DEAD-box helicase 10
OGG1	4968	3p25.3	8-oxoguanine DNA glycosylase
RPS18	6222	6p21.32	ribosomal protein S18
PDCD11	22984	10q24.33	programmed cell death 11
DROSHA	29102	5p13.3	drosha ribonuclease III
NOM1	64434	7q36.3	nucleolar protein with MIF4G domain 1
DDX52	11056	17q12	DExD-box helicase 52
ESF1	51575	20p12.1	ESF1 nucleolar pre-rRNA processing protein homolog
NGDN	25983	14q11.2	neuroguidin
DDX39A	10212	19p13.12	DExD-box helicase 39A
YLPM1	56252	14q24.3	YLP motif containing 1
GTPBP1	9567	22q13.1	GTP binding protein 1
DDX56	54606	7p13	DEAD-box helicase 56
RPL6	6128	12q24.13	ribosomal protein L6
CHTF8	54921	16q22.1	chromosome transmission fidelity factor 8
BAZ1A	11177	14q13.1-q13.2	bromodomain adjacent to zinc finger domain 1A
NDC1	55706	1p32.3	NDC1 transmembrane nucleoporin
HNMT	3176	2q22.1	histamine N-methyltransferase
NIFK	84365	2q14.3	nucleolar protein interacting with the FHA domain of MKI67
CMSS1	84319	3q12.1	cms1 ribosomal small subunit homolog
UTP11L	NA	NA	NA
EED	8726	11q14.2	embryonic ectoderm development
APEX2	27301	Xp11.21	apurinic/apyrimidinic endodeoxyribonuclease 2
ZNF507	22847	19q13.11	zinc finger protein 507
ERCC6L	54821	Xq13.1	ERCC excision repair 6 like, spindle assembly checkpoint helicase
ANKMY2	57037	7p21.1	ankyrin repeat and MYND domain containing 2
KPNA2	3838	17q24.2	karyopherin subunit alpha 2
BUB1B	701	15q15.1	BUB1 mitotic checkpoint serine/threonine kinase B
RAD54L2	23132	3p21.2	RAD54 like 2
RCL1	10171	9p24.1	RNA terminal phosphate cyclase like 1
RPL30	6156	8q22.2	ribosomal protein L30
EPCAM	4072	2p21	epithelial cell adhesion molecule
MSH6	2956	2p16.3	mutS homolog 6
TOMM22	56993	22q13.1	translocase of outer mitochondrial membrane 22
CENPH	64946	5q13.2	centromere protein H
C1orf112	55732	1q24.2	chromosome 1 open reading frame 112
CEP55	55165	10q23.33	centrosomal protein 55
CENPO	79172	2p23.3	centromere protein O
TOMM20	9804	1q42.3	translocase of outer mitochondrial membrane 20
DCAF13	25879	8q22.3	DDB1 and CUL4 associated factor 13
RAD51AP1	10635	12p13.32	RAD51 associated protein 1
HAUS8	93323	19p13.11	HAUS augmin like complex subunit 8
UPF3B	65109	Xq24	UPF3B regulator of nonsense mediated mRNA decay
WDR46	9277	6p21.32	WD repeat domain 46
NOL12	79159	22q13.1	nucleolar protein 12
HAUS6	54801	9p22.1	HAUS augmin like complex subunit 6
ASPM	259266	1q31.3	abnormal spindle microtubule assembly
TOMM40	10452	19q13.32	translocase of outer mitochondrial membrane 40
RRP36	88745	6p21.1	ribosomal RNA processing 36
HAUS2	55142	15q15.2	HAUS augmin like complex subunit 2
NUP155	9631	5p13.2	nucleoporin 155
RRP7A	27341	22q13.2	ribosomal RNA processing 7 homolog A
ZNF292	23036	6q14.3	zinc finger protein 292
SLC7A1	6541	13q12.3	solute carrier family 7 member 1
NOL9	79707	1p36.31	nucleolar protein 9
ZC3H11A	9877	1q32.1	zinc finger CCCH-type containing 11A
AKAP12	9590	6q25.1	A-kinase anchoring protein 12
MDC1	9656	6p21.33	mediator of DNA damage checkpoint 1
RPL5	6125	1p22.1	ribosomal protein L5
USP39	10713	2p11.2	ubiquitin specific peptidase 39
TRMT61A	115708	14q32.33	tRNA methyltransferase 61A
MTIF2	4528	2p16.1	mitochondrial translational initiation factor 2
TTF2	8458	1p13.1	transcription termination factor 2
MRTO4	51154	1p36.13	MRT4 homolog, ribosome maturation factor
RPL21	6144	13q12.2	ribosomal protein L21
SERBP1	26135	1p31.3	SERPINE1 mRNA binding protein 1
RRP9	9136	3p21.2	ribosomal RNA processing 9, U3 small nucleolar RNA binding protein
RPS13	6207	11p15.1	ribosomal protein S13
NCAPG2	54892	7q36.3	non-SMC condensin II complex subunit G2
RPS7	6201	2p25.3	ribosomal protein S7
KDM5C	8242	Xp11.22	lysine demethylase 5C
RPL28	6158	19q13.42	ribosomal protein L28
RIF1	55183	2q23.3	replication timing regulatory factor 1
SREK1	140890	5q12.3	splicing regulatory glutamic acid and lysine rich protein 1
EIF2S2	8894	20q11.22	eukaryotic translation initiation factor 2 subunit beta
WDR18	57418	19p13.3	WD repeat domain 18
NOC2L	26155	1p36.33	NOC2 like nucleolar associated transcriptional repressor
TPX2	22974	20q11.21	TPX2 microtubule nucleation factor
AFG3L2	10939	18p11.21	AFG3 like matrix AAA peptidase subunit 2
INCENP	3619	11q12.3	inner centromere protein
BLM	641	15q26.1	BLM RecQ like helicase
CKS2	1164	9q22.2	CDC28 protein kinase regulatory subunit 2
FANCI	55215	15q26.1	FA complementation group I
POLR1E	64425	9p13.2	RNA polymerase I subunit E
DEK	7913	6p22.3	DEK proto-oncogene
EIF4A3	9775	17q25.3	eukaryotic translation initiation factor 4A3
RPL27	6155	17q21.31	ribosomal protein L27
TOMM5	401505	9p13.2	translocase of outer mitochondrial membrane 5
QSER1	79832	11p13	glutamine and serine rich 1
NAA15	80155	4q31.1	N(alpha)-acetyltransferase 15, NatA auxiliary subunit
CCBL2	NA	NA	NA
SHCBP1	79801	16q11.2	SHC binding and spindle associated 1
SUV39H2	79723	10p13	suppressor of variegation 3-9 homolog 2
TOP3A	7156	17p11.2	DNA topoisomerase III alpha
PARP2	10038	14q11.2	poly(ADP-ribose) polymerase 2
SLC39A14	23516	8p21.3	solute carrier family 39 member 14
POLA1	5422	Xp22.11-p21.3	DNA polymerase alpha 1, catalytic subunit
UPF1	5976	19p13.11	UPF1 RNA helicase and ATPase
RPS11	6205	19q13.33	ribosomal protein S11
PSMD14	10213	2q24.2	proteasome 26S subunit, non-ATPase 14
ZNF280C	55609	Xq26.1	zinc finger protein 280C
GMNN	51053	6p22.3	geminin DNA replication inhibitor
SENP6	26054	6q14.1	SUMO specific peptidase 6
ZNHIT6	54680	1p22.3	zinc finger HIT-type containing 6
UTP20	27340	12q23.2	UTP20 small subunit processome component
PRC1	9055	15q26.1	protein regulator of cytokinesis 1
C12orf45	121053	12q23.3	chromosome 12 open reading frame 45
RBMX2	51634	Xq26.1	RNA binding motif protein X-linked 2
RPL13	6137	16q24.3	ribosomal protein L13
WDR43	23160	2p23.2	WD repeat domain 43
C1orf131	128061	1q42.2	chromosome 1 open reading frame 131
PSIP1	11168	9p22.3	PC4 and SFRS1 interacting protein 1
SUZ12	23512	17q11.2	SUZ12 polycomb repressive complex 2 subunit
RFC5	5985	12q24.23	replication factor C subunit 5
MSH2	4436	2p21-p16.3	mutS homolog 2
HAUS3	79441	4p16.3	HAUS augmin like complex subunit 3
PRPF18	8559	10p13	pre-mRNA processing factor 18
LARP4B	23185	10p15.3	La ribonucleoprotein domain family member 4B
VRK1	7443	14q32.2	VRK serine/threonine kinase 1
CENPI	2491	Xq22.1	centromere protein I
PLA2R1	22925	2q24.2	phospholipase A2 receptor 1
BMS1	9790	10q11.21	BMS1 ribosome biogenesis factor
RPS27A	6233	2p16.1	ribosomal protein S27a
BIRC5	332	17q25.3	baculoviral IAP repeat containing 5
NOC4L	79050	12q24.33	nucleolar complex associated 4 homolog
NUP93	9688	16q13	nucleoporin 93
RRP1B	23076	21q22.3	ribosomal RNA processing 1B
LTV1	84946	6q24.2	LTV1 ribosome biogenesis factor
DNAJC9	23234	10q22.2	DnaJ heat shock protein family (Hsp40) member C9
KIF11	3832	10q23.33	kinesin family member 11
NUP160	23279	11p11.2	nucleoporin 160
NCAPH2	29781	22q13.33	non-SMC condensin II complex subunit H2
RPP30	10556	10q23.31	ribonuclease P/MRP subunit p30
RFC4	5984	3q27.3	replication factor C subunit 4
SKA3	221150	13q12.11	spindle and kinetochore associated complex subunit 3
CDC7	8317	1p22.1	cell division cycle 7
NUP50	10762	22q13.31	nucleoporin 50
CDCA2	157313	8p21.2	cell division cycle associated 2
WDHD1	11169	14q22.2-q22.3	WD repeat and HMG-box DNA binding protein 1
OGT	8473	Xq13.1	O-linked N-acetylglucosamine (GlcNAc) transferase
HAUS1	115106	18q21.1	HAUS augmin like complex subunit 1
RPF1	80135	1p22.3	ribosome production factor 1 homolog
HAUS4	54930	14q11.2	HAUS augmin like complex subunit 4
CCDC59	29080	12q21.31	coiled-coil domain containing 59
PRIM1	5557	12q13.3	DNA primase subunit 1
MKI67	4288	10q26.2	marker of proliferation Ki-67
ZNF146	7705	19q13.12	zinc finger protein 146
EIF2S1	1965	14q23.3	eukaryotic translation initiation factor 2 subunit alpha
NSA2	10412	5q13.3	NSA2 ribosome biogenesis factor
TXLNG	55787	Xp22.2	taxilin gamma
DHX57	90957	2p22.1	DExH-box helicase 57
TIA1	7072	2p13.3	TIA1 cytotoxic granule associated RNA binding protein
RPS19	6223	19q13.2	ribosomal protein S19
SKA1	220134	18q21.1	spindle and kinetochore associated complex subunit 1
ZBTB33	10009	Xq24	zinc finger and BTB domain containing 33
NSMCE2	286053	8q24.13	NSE2 (MMS21) homolog, SMC5-SMC6 complex SUMO ligase
NAT10	55226	11p13	N-acetyltransferase 10
IQCB1	9657	3q13.33	IQ motif containing B1
ZC3H14	79882	14q31.3	zinc finger CCCH-type containing 14
LRP1	4035	12q13.3	LDL receptor related protein 1
NUP85	79902	17q25.1	nucleoporin 85
DTL	51514	1q32.3	denticleless E3 ubiquitin protein ligase homolog
KDM2A	22992	11q13.2	lysine demethylase 2A
ORC6	23594	16q11.2	origin recognition complex subunit 6
HECA	51696	6q24.1	hdc homolog, cell cycle regulator
ATAD2B	54454	2p24.1-p23.3	ATPase family AAA domain containing 2B
RFC2	5982	7q11.23	replication factor C subunit 2
ANKRD11	29123	16q24.3	ankyrin repeat domain 11
EIF2S3	1968	Xp22.11	eukaryotic translation initiation factor 2 subunit gamma
DHX33	56919	17p13.2	DEAH-box helicase 33
EIF3E	3646	8q23.1	eukaryotic translation initiation factor 3 subunit E
KNTC1	9735	12q24.31	kinetochore associated 1
GINS3	64785	16q21	GINS complex subunit 3
TCF20	6942	22q13.2	transcription factor 20
PNO1	56902	2p14	partner of NOB1 homolog
LAS1L	81887	Xq12	LAS1 like, ribosome biogenesis factor
CCDC137	339230	17q25.3	coiled-coil domain containing 137
SMG1	23049	16p12.3	SMG1 nonsense mediated mRNA decay associated PI3K related kinase
RCC2	55920	1p36.13	regulator of chromosome condensation 2
SMPD4	55627	2q21.1	sphingomyelin phosphodiesterase 4
ADNP2	22850	18q23	ADNP homeobox 2
SSRP1	6749	11q12.1	structure specific recognition protein 1
CDCA5	113130	11q13.1	cell division cycle associated 5
SLC4A1AP	22950	2p23.3	solute carrier family 4 member 1 adaptor protein
CEP152	22995	15q21.1	centrosomal protein 152
TOE1	114034	1p34.1	target of EGR1, exonuclease
TTF1	7270	9q34.13	transcription termination factor 1
AGGF1	55109	5q13.3	angiogenic factor with G-patch and FHA domains 1
RBM28	55131	7q32.1	RNA binding motif protein 28
CDK9	1025	9q34.11	cyclin dependent kinase 9
NUP133	55746	1q42.13	nucleoporin 133
C3orf17	NA	NA	NA
ZFYVE21	79038	14q32.33	zinc finger FYVE-type containing 21
IQGAP3	128239	1q22	IQ motif containing GTPase activating protein 3
MGA	23269	15q15.1	MAX dimerization protein MGA
MORC2	22880	22q12.2	MORC family CW-type zinc finger 2
URB2	9816	1q42.13	URB2 ribosome biogenesis homolog
RPL34	6164	4q25	ribosomal protein L34
METTL8	79828	2q31.1	methyltransferase like 8
PSMD3	5709	17q21.1	proteasome 26S subunit, non-ATPase 3
CCDC14	64770	3q21.1	coiled-coil domain containing 14
RALY	22913	20q11.22	RALY heterogeneous nuclear ribonucleoprotein
DBR1	51163	3q22.3	debranching RNA lariats 1
CD3EAP	10849	19q13.32	CD3e molecule associated protein
EIF3H	8667	8q23.3-q24.11	eukaryotic translation initiation factor 3 subunit H
CIT	11113	12q24.23	citron rho-interacting serine/threonine kinase
CELF1	10658	11p11.2	CUGBP Elav-like family member 1
NUP107	57122	12q15	nucleoporin 107
MYBBP1A	10514	17p13.2	MYB binding protein 1a
TSR1	55720	17p13.3	TSR1 ribosome maturation factor
CDK2AP1	8099	12q24.31	cyclin dependent kinase 2 associated protein 1
HSPA12B	116835	20p13	heat shock protein family A (Hsp70) member 12B
JAM3	83700	11q25	junctional adhesion molecule 3
NPAT	4863	11q22.3	nuclear protein, coactivator of histone transcription
AAAS	8086	12q13.13	aladin WD repeat nucleoporin
CDC73	79577	1q31.2	cell division cycle 73
MND1	84057	4q31.3	meiotic nuclear divisions 1
WRNIP1	56897	6p25.2	WRN helicase interacting protein 1
RPP40	10799	6p25.1	ribonuclease P/MRP subunit p40
KNSTRN	90417	15q15.1	kinetochore localized astrin (SPAG5) binding protein
RPE	6120	2q34	ribulose-5-phosphate-3-epimerase
URB1	9875	21q22.11	URB1 ribosome biogenesis homolog
CUL1	8454	7q36.1	cullin 1
CENPU	79682	4q35.1	centromere protein U
THOC5	8563	22q12.2	THO complex 5
RPL7A	6130	9q34.2	ribosomal protein L7a
NUP205	23165	7q33	nucleoporin 205
MRPL4	51073	19p13.2	mitochondrial ribosomal protein L4
SUPT16H	11198	14q11.2	SPT16 homolog, facilitates chromatin remodeling subunit
HIRA	7290	22q11.21	histone cell cycle regulator
SMEK2	NA	NA	NA
BRMS1L	84312	14q13.2	BRMS1 like transcriptional repressor
XRN1	54464	3q23	5'-3' exoribonuclease 1
PSMD6	9861	3p14.1	proteasome 26S subunit, non-ATPase 6
NOL7	51406	6p23	nucleolar protein 7
RPL23	9349	17q12	ribosomal protein L23
RPL37A	6168	2q35	ribosomal protein L37a
ZWILCH	55055	15q22.31	zwilch kinetochore protein
KIAA1524	NA	NA	NA
THOC6	79228	16p13.3	THO complex 6
DNMT1	1786	19p13.2	DNA methyltransferase 1
NUP153	9972	6p22.3	nucleoporin 153
USP36	57602	17q25.3	ubiquitin specific peptidase 36
EBNA1BP2	10969	1p34.2	EBNA1 binding protein 2
MEN1	4221	11q13.1	menin 1
CNOT2	4848	12q15	CCR4-NOT transcription complex subunit 2
HELZ2	85441	20q13.33	helicase with zinc finger 2
DDX31	64794	9q34.13	DEAD-box helicase 31
SMC5	23137	9q21.12	structural maintenance of chromosomes 5
COL5A1	1289	9q34.3	collagen type V alpha 1 chain
RBM45	129831	2q31.2	RNA binding motif protein 45
PLXDC2	84898	10p12.31	plexin domain containing 2
FEN1	2237	11q12.2	flap structure-specific endonuclease 1
RPL31	6160	2q11.2	ribosomal protein L31
RNF138	51444	18q12.1	ring finger protein 138
NCBP1	4686	9q22.33	nuclear cap binding protein subunit 1
YBX1	4904	1p34.2	Y-box binding protein 1
RAD18	56852	3p25.3	RAD18 E3 ubiquitin protein ligase
L3MBTL2	83746	22q13.2	L3MBTL histone methyl-lysine binding protein 2
TFIP11	24144	22q12.1	tuftelin interacting protein 11
WHSC1	NA	NA	NA
CHAF1A	10036	19p13.3	chromatin assembly factor 1 subunit A
PRPF19	27339	11q12.2	pre-mRNA processing factor 19
KDM4A	9682	1p34.2-p34.1	lysine demethylase 4A
CDH11	1009	16q21	cadherin 11
UTP14A	10813	Xq26.1	UTP14A small subunit processome component
NUP210	23225	3p25.1	nucleoporin 210
PINX1	54984	8p23.1	PIN2 (TERF1) interacting telomerase inhibitor 1
MATR3	9782	5q31.2	matrin 3
REEP4	80346	8p21.3	receptor accessory protein 4
WDR76	79968	15q15.3	WD repeat domain 76
FAF1	11124	1p32.3	Fas associated factor 1
DIMT1	27292	5q12.1	DIMT1 rRNA methyltransferase and ribosome maturation factor
RPL24	6152	3q12.3	ribosomal protein L24
FBXO11	80204	2p16.3	F-box protein 11
DCUN1D5	84259	11q22.3	defective in cullin neddylation 1 domain containing 5
DNTTIP2	30836	1p22.1	deoxynucleotidyltransferase terminal interacting protein 2
POLE	5426	12q24.33	DNA polymerase epsilon, catalytic subunit
SCML2	10389	Xp22.13	Scm polycomb group protein like 2
TOPBP1	11073	3q22.1	DNA topoisomerase II binding protein 1
TFAP4	7023	16p13.3	transcription factor AP-4
DDX55	57696	12q24.31	DEAD-box helicase 55
SUPT5H	6829	19q13.2	SPT5 homolog, DSIF elongation factor subunit
FAM76B	143684	11q21	family with sequence similarity 76 member B
SRSF2	6427	17q25.1	serine and arginine rich splicing factor 2
PWP1	11137	12q23.3	PWP1 homolog, endonuclein
XPO1	7514	2p15	exportin 1
DIDO1	11083	20q13.33	death inducer-obliterator 1
PUS1	80324	12q24.33	pseudouridine synthase 1
UBE2S	27338	19q13.42	ubiquitin conjugating enzyme E2 S
NUSAP1	51203	15q15.1	nucleolar and spindle associated protein 1
RPL14	9045	3p22.1	ribosomal protein L14
FARS2	10667	6p25.1	phenylalanyl-tRNA synthetase 2, mitochondrial
FLRT2	23768	14q31.3	fibronectin leucine rich transmembrane protein 2
SETD1A	9739	16p11.2	SET domain containing 1A, histone lysine methyltransferase
FXR1	8087	3q26.33	FMR1 autosomal homolog 1
PCNA	5111	20p12.3	proliferating cell nuclear antigen
MED17	9440	11q21	mediator complex subunit 17
ZW10	9183	11q23.2	zw10 kinetochore protein
TNPO3	23534	7q32.1	transportin 3
ZNF740	283337	12q13.13	zinc finger protein 740
DIS3L	115752	15q22.31	DIS3 like exosome 3'-5' exoribonuclease
POP4	10775	19q12	POP4 homolog, ribonuclease P/MRP subunit
ACTL6A	86	3q26.33	actin like 6A
HAT1	8520	2q31.1	histone acetyltransferase 1
YME1L1	10730	10p12.1	YME1 like 1 ATPase
SMARCA4	6597	19p13.2	SWI/SNF related, matrix associated, actin dependent regulator of chromatin, subfamily a, member 4
MSRB3	253827	12q14.3	methionine sulfoxide reductase B3
FAM210A	125228	18p11.21	family with sequence similarity 210 member A

## Sheet: IV
	Supplementary Table IV. Key cell cycle related Reactome pathways enriched by 434 SRTNS. The prediction was conducted using STRING.
	Term ID	Term Description	Observed Gene Count	Background Gene Count	False Discovery Rate	Matching proteins
	HSA-1640170	Cell Cycle	92	586	6.79e-45	AAAS,BLM,BUB1B,CCNA2,CCNB1,CDC20,CDC45,CDC7,CDCA5,CDCA8,CDK1,CENPF,CENPH,CENPI,CENPO,CENPQ,CENPU,CEP152,CHEK1,CUL1,ERCC6L,FEN1,GMNN,HAUS1,HAUS2,HAUS3,HAUS4,HAUS5,HAUS6,HAUS8,INCENP,KIF20A,KIF2C,KNTC1,MASTL,MCM10,MCM2,MCM3,MCM4,MCM5,MCM6,MCM7,MDC1,MND1,NCAPD2,NCAPD3,NCAPG,NCAPG2,NCAPH,NCAPH2,NDC1,NDC80,NUF2,NUP107,NUP133,NUP153,NUP155,NUP160,NUP205,NUP210,NUP50,NUP85,NUP93,ORC6,PCNA,PLK1,POLA1,POL…
	HSA-68886	M Phase	61	343	7.63e-32	AAAS,BUB1B,CCNB1,CDC20,CDCA5,CDCA8,CDK1,CENPF,CENPH,CENPI,CENPO,CENPQ,CENPU,CEP152,ERCC6L,HAUS1,HAUS2,HAUS3,HAUS4,HAUS5,HAUS6,HAUS8,INCENP,KIF20A,KIF2C,KNTC1,MASTL,NCAPD2,NCAPD3,NCAPG,NCAPG2,NCAPH,NCAPH2,NDC1,NDC80,NUF2,NUP107,NUP133,NUP153,NUP155,NUP160,NUP205,NUP210,NUP50,NUP85,NUP93,PLK1,PSMD14,PSMD3,RCC2,RPS27A,SKA1,SMC2,SMC4,SPC24,SPC25,VRK1,XPO1,ZW10,ZWILCH,ZWINT
	HSA-69242	S Phase	24	156	1.5e-11	CCNA2,CDC45,CDCA5,CUL1,FEN1,MCM2,MCM3,MCM4,MCM5,MCM6,MCM7,ORC6,PCNA,POLA1,POLA2,POLE,PRIM1,PRIM2,PSMD14,PSMD3,RFC2,RFC4,RFC5,RPS27A
	HSA-69206	G1/S Transition	24	128	4.08e-13	CCNA2,CCNB1,CDC45,CDC7,CDK1,CUL1,GMNN,MCM10,MCM2,MCM3,MCM4,MCM5,MCM6,MCM7,ORC6,PCNA,POLA1,POLA2,POLE,PRIM1,PRIM2,PSMD14,PSMD3,RPS27A
	HSA-69275	G2/M Transition	19	189	9.2e-07	CCNA2,CCNB1,CDK1,CENPF,CEP152,CUL1,HAUS1,HAUS2,HAUS3,HAUS4,HAUS5,HAUS6,HAUS8,PLK1,PSMD14,PSMD3,RPS27A,TPX2,XPO1
	HSA-69620	Cell Cycle Checkpoints	53	265	1.04e-29	BLM,BUB1B,CCNA2,CCNB1,CDC20,CDC45,CDC7,CDCA8,CDK1,CENPF,CENPH,CENPI,CENPO,CENPQ,CENPU,CHEK1,ERCC6L,INCENP,KIF2C,KNTC1,MCM10,MCM2,MCM3,MCM4,MCM5,MCM6,MCM7,MDC1,NDC80,NUF2,NUP107,NUP133,NUP160,NUP85,ORC6,PLK1,PSMD14,PSMD3,RCC2,RFC2,RFC4,RFC5,RPS27A,SKA1,SPC24,SPC25,TOP3A,TOPBP1,WHSC1,XPO1,ZW10,ZWILCH,ZWINT

## Sheet: V
	Abbreviation	Full name
	ACC	Adrenocortical carcinoma
	BLCA	Bladder Urothelial Carcinoma
	BRCA	Breast invasive carcinoma
	CESC	Cervical squamous cell carcinoma and endocervical adenocarcinoma
	CHOL	Cholangiocarcinoma
	CNTL	Controls
	COAD	Colon adenocarcinoma
	DLBC	Lymphoid Neoplasm Diffuse Large B-cell Lymphoma
	ESCA	Esophageal carcinoma
	FPPP	FFPE Pilot Phase II
	GBM	Glioblastoma multiforme
	HNSC	Head and Neck squamous cell carcinoma
	KICH	Kidney Chromophobe
	KIRC	Kidney renal clear cell carcinoma
	KIRP	Kidney renal papillary cell carcinoma
	LAML	Acute Myeloid Leukemia
	LCML	Chronic Myelogenous Leukemia
	LGG	Brain Lower Grade Glioma
	LIHC	Liver hepatocellular carcinoma
	LUAD	Lung adenocarcinoma
	LUSC	Lung squamous cell carcinoma
	MESO	Mesothelioma
	MISC	Miscellaneous
	OV	Ovarian serous cystadenocarcinoma
	PAAD	Pancreatic adenocarcinoma
	PCPG	Pheochromocytoma and Paraganglioma
	PRAD	Prostate adenocarcinoma
	READ	Rectum adenocarcinoma
	SARC	Sarcoma
	SKCM	Skin Cutaneous Melanoma
	STAD	Stomach adenocarcinoma
	TGCT	Testicular Germ Cell Tumors
	THCA	Thyroid carcinoma
	THYM	Thymoma
	UCEC	Uterine Corpus Endometrial Carcinoma
	UCS	Uterine Carcinosarcoma
	UVM	Uveal Melanoma
